# Supplementary material for: Solar light driven photocatalytic degradation of levofloxacin using TiO2/carbon-dot nanocomposites
Source: Royal Society of Chemistry journal article supplement (doi:10.1039/c7nj05118b), 2018-01-01
Supplement: c7nj05118b1.pdf [file c7nj05118b1.pdf]

## Supporting Information

### **Solar light driven photocatalytic degradation of levofloxacin using TiO<sub>2</sub>/Carbon-dots nanocomposite**

**Shelja Sharma<sup>1</sup>, Ahmad Umar,<sup>2,3\*</sup> Surinder Kumar Mehta<sup>1</sup>, Alex. O. Ibhaddon<sup>4</sup>, Sushil Kumar Kansal<sup>5,\*</sup>**

*<sup>1</sup>Department of Chemistry and Centre of Advanced Studies, Panjab University, Chandigarh-160014, India*

*<sup>2</sup>Department of Chemistry, College of Science and Arts, Najran University, P.O.Box-1988, Najran-11001, Kingdom of Saudi Arabia,*

*<sup>3</sup>Promising Centre for Sensors and Electronic Devices (PCSED), Najran University, P.O.Box-1988, Najran-11001, Kingdom of Saudi Arabia*

*<sup>4</sup>Department of Chemical Engineering, University of Hull, Hull, United Kingdom*

*<sup>5</sup>Dr. S. S. Bhatnagar University Institute of Chemical Engineering and Technology, Panjab University, Chandigarh-160014, India*

\*Corresponding Authors:

[ahmadumar786@gmail.com](mailto:ahmadumar786@gmail.com) (Ahmad Umar)

[sushilkk1@yahoo.co.in](mailto:sushilkk1@yahoo.co.in); [sushilkk1@pu.ac.in](mailto:sushilkk1@pu.ac.in) (S. K. Kansal)

1 #95 RT: 0.70 AV: 1 NL: 2.81E4  
T: ITMS + c ESI Full ms [50.00-600.00]

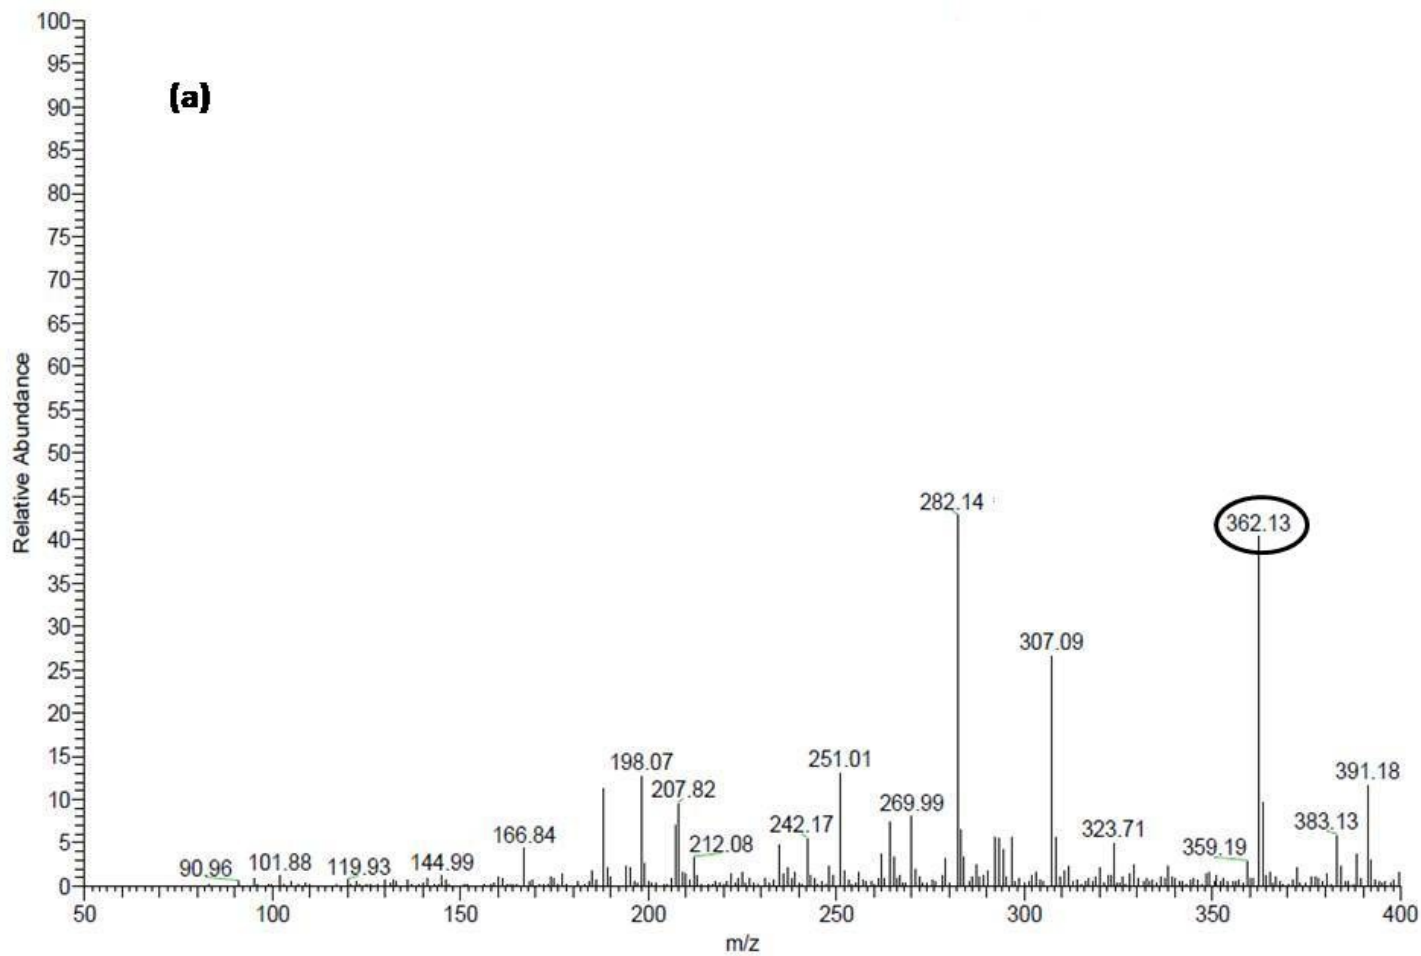

2 #77-154 RT: 0.57-1.14 AV: 78 NL: 2.19E4  
T: ITMS + c ESI Full ms [50.00-600.00]

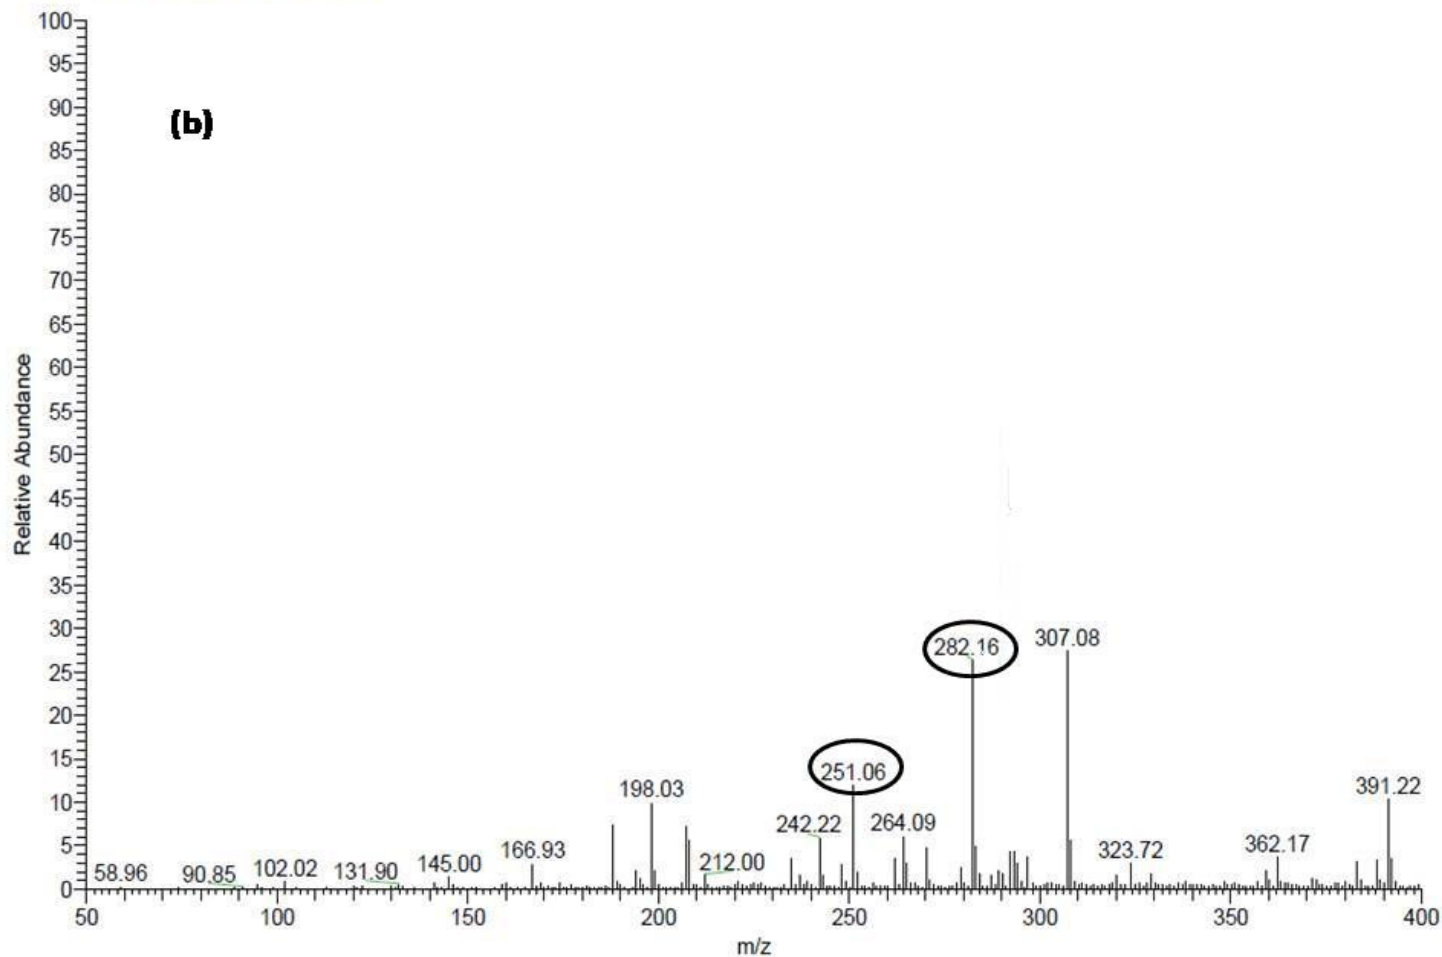

3 #92 RT: 0.68 AV: 1 NL: 2.27E4  
T: ITMS + c ESI Full ms [50.00-600.00]

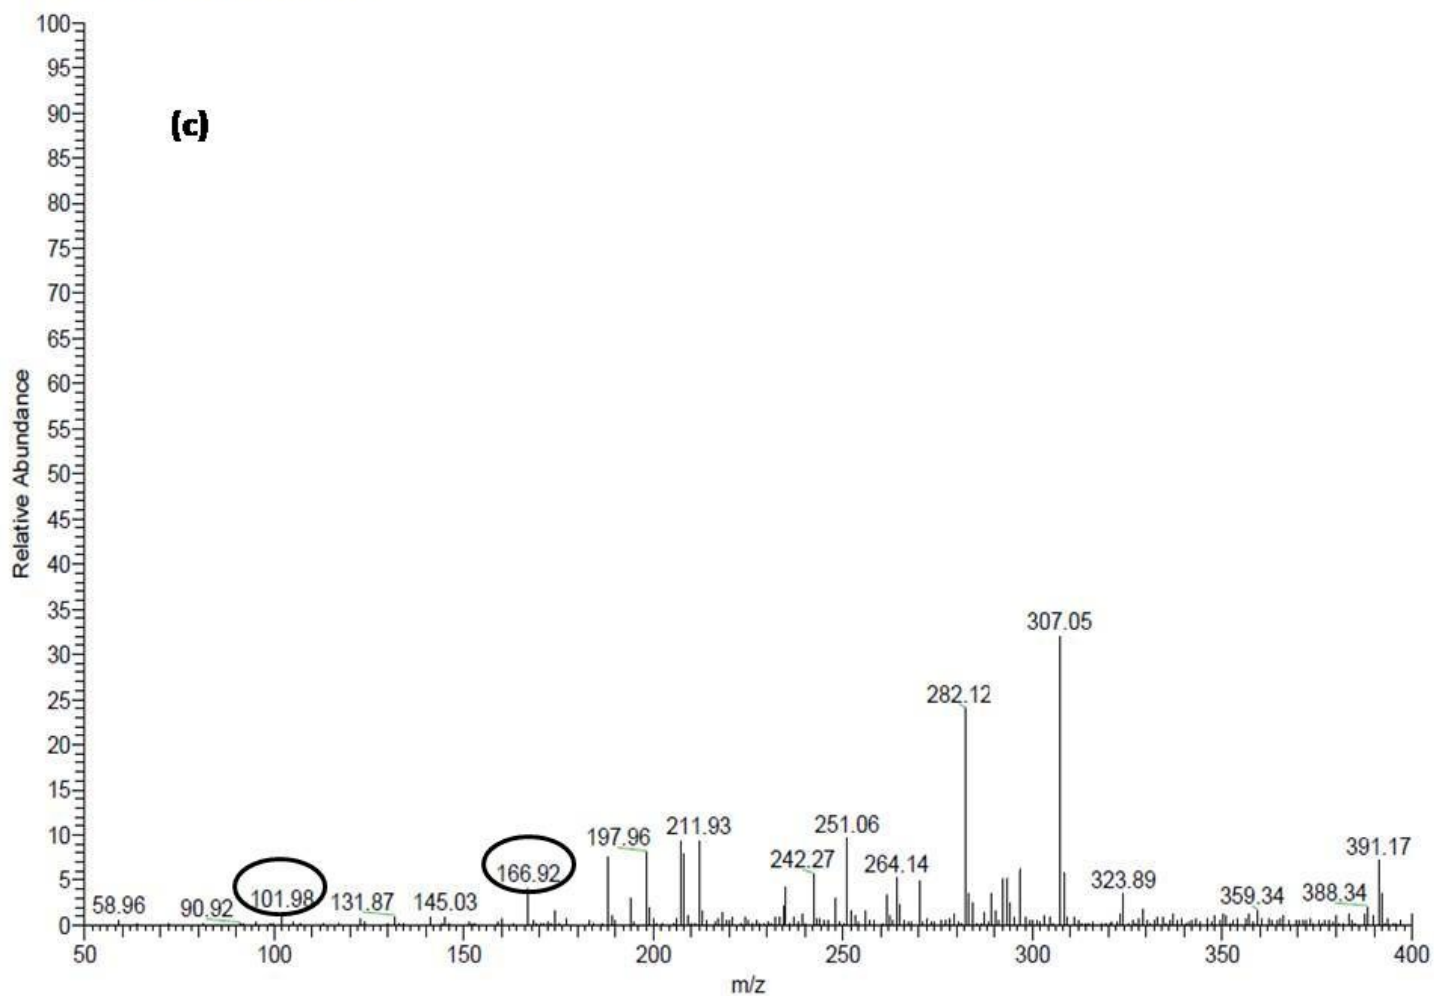

**Fig. S1** MS spectrum of  $[M+H]^+$  ions of levofloxacin (a) parent compound; (b) and (c) its main products formed during the visible light induced photocatalytic degradation
